# Supplementary material for: Functional analysis of mammalian phospholipase D enzymes
Source: PubMed Central journal article supplement (PMC6435507; doi:10.1042/bsr20181690), 2018-12-07
Supplement: bsr20181690_Supp5.pdf [file bsr20181690_Supp5.pdf]

| Molecular Species | Compared to WT           |                   |                   | Compared to PLD <sub>3.1</sub> |                                        |                   |
|-------------------|--------------------------|-------------------|-------------------|--------------------------------|----------------------------------------|-------------------|
|                   | dPLD                     | hPLD <sub>1</sub> | hPLD <sub>2</sub> | dPLD                           | hPLD <sub>1</sub>                      | hPLD <sub>2</sub> |
| PA(16:0/16:0)     | 0.036                    | 0.0957            | 0.026             | 0.000                          | 0.000                                  | 0.000             |
| PA(16:0/16:1)     | 0.076                    | 0.0023            | 0.000             | 0.000                          | 0.003                                  | 0.001             |
| PA(14:0/18:1)     | 0.309                    | 0.0005            | 0.000             | 0.000                          | 0.000                                  | 0.003             |
| PA(16:1/16:1)     | 0.955                    | 0.0096            | 0.002             | 0.000                          | 0.037                                  | 0.194             |
| PA(14:0/18:2)     | 0.317                    | 0.0223            | 0.002             | 0.000                          | 0.000                                  | 0.000             |
| PA(14:0/18:3)     | 0.947                    | 0.0435            | 0.006             | 0.001                          | 0.000                                  | 0.000             |
| PA(16:0/18:0)     | 0.264                    | 0.0692            | 0.004             | 0.004                          | 0.078                                  | 0.215             |
| PA(16:0/18:1)     | 0.126                    | 0.1283            | 0.000             | 0.002                          | 0.001                                  | 0.000             |
| PA(16:0/18:2)     | 0.681                    | 0.0217            | 0.000             | 0.000                          | 0.000                                  | 0.000             |
| PA(16:1/18:1)     | 0.577                    | 0.5463            | 0.000             | 0.000                          | 0.003                                  | 0.000             |
| PA(16:2/18:0)     | 0.362                    | 0.9433            | 0.095             | 0.003                          | 0.010                                  | 0.142             |
| PA(16:0/18:3)     | 0.109                    | 0.0172            | 0.001             | 0.000                          | 0.000                                  | 0.000             |
| PA(16:1/18:2)     | 0.340                    | 0.0045            | 0.001             | 0.000                          | 0.000                                  | 0.001             |
| PA(16:1/18:3)     | 0.919                    | 0.0028            | 0.000             | 0.000                          | 0.001                                  | 0.020             |
| PA(14:0/16:0)     | 0.210                    | 0.1214            | 0.000             | 0.000                          | 0.001                                  | 0.000             |
| PA(16:0/14:1)     | 0.362                    | 0.0121            | 0.024             | 0.001                          | 0.002                                  | 0.006             |
| PA(16:1/18:0)     | 0.510                    | 0.0105            | 0.002             | 0.000                          | 0.006                                  | 0.256             |
| PA(14:1/16:1)     | 0.931                    | 0.0009            | 0.006             | 0.002                          | 0.148                                  | 0.961             |
| PA(18:0/20:0)     | 0.078                    | 0.2644            | 0.003             | 0.002                          | 0.005                                  | 0.009             |
| PA(18:2/20:0)     | 0.063                    | 0.2188            | 0.003             | 0.000                          | 0.001                                  | 0.000             |
| PA(18:3/20:0)     | 0.337                    | 0.4220            | 0.035             | 0.000                          | 0.000                                  | 0.001             |
| PA(18:2/18:3)     | 0.000                    | 0.0006            | 0.000             | 0.000                          | 0.002                                  | 0.000             |
| PA(18:1/18:3)     | 0.007                    | 0.0270            | 0.001             | 0.000                          | 0.000                                  | 0.000             |
| PA(18:2/18:2)     | 0.933                    | 0.2898            | 0.006             | 0.000                          | 0.002                                  | 0.000             |
| PA(18:3/18:1)     | 0.983                    | 0.4195            | 0.004             | 0.000                          | 0.001                                  | 0.000             |
| PA(18:0/18:3)     | 0.237                    | 0.1413            | 0.017             | 0.000                          | 0.005                                  | 0.002             |
| PA(18:1/18:2)     | 0.145                    | 0.6570            | 0.002             | 0.000                          | 0.000                                  | 0.000             |
| PA(18:0/18:2)     | 0.699                    | 0.4814            | 0.006             | 0.000                          | 0.002                                  | 0.000             |
| PA(18:1/18:1)     | 0.739                    | 0.4701            | 0.007             | 0.000                          | 0.003                                  | 0.001             |
| PA(16:0/20:0)     | 0.046                    | 0.4822            | 0.013             | 0.000                          | 0.002                                  | 0.000             |
|                   |                          |                   |                   |                                |                                        |                   |
|                   |                          | p>0.05            |                   |                                |                                        | p>0.05            |
|                   | Not lower than Wild Type |                   |                   |                                | Not elevated above dPLD <sub>3.1</sub> |                   |
